# Supplementary material for: Direct synthesis and aqueous solution properties of Y-shaped, stimulus-responsive block copolymer surfactantsElectronic Supplementary Information (ESI) available: synthesis and characterisation of diblock copolymers. See http://www.rsc.org/suppdata/cc/b4/b400161c/
Source: Royal Society of Chemistry journal article supplement (doi:10.1039/b400161c), 2004-01-01
Supplement: b400161c.doc [file b400161c.doc]

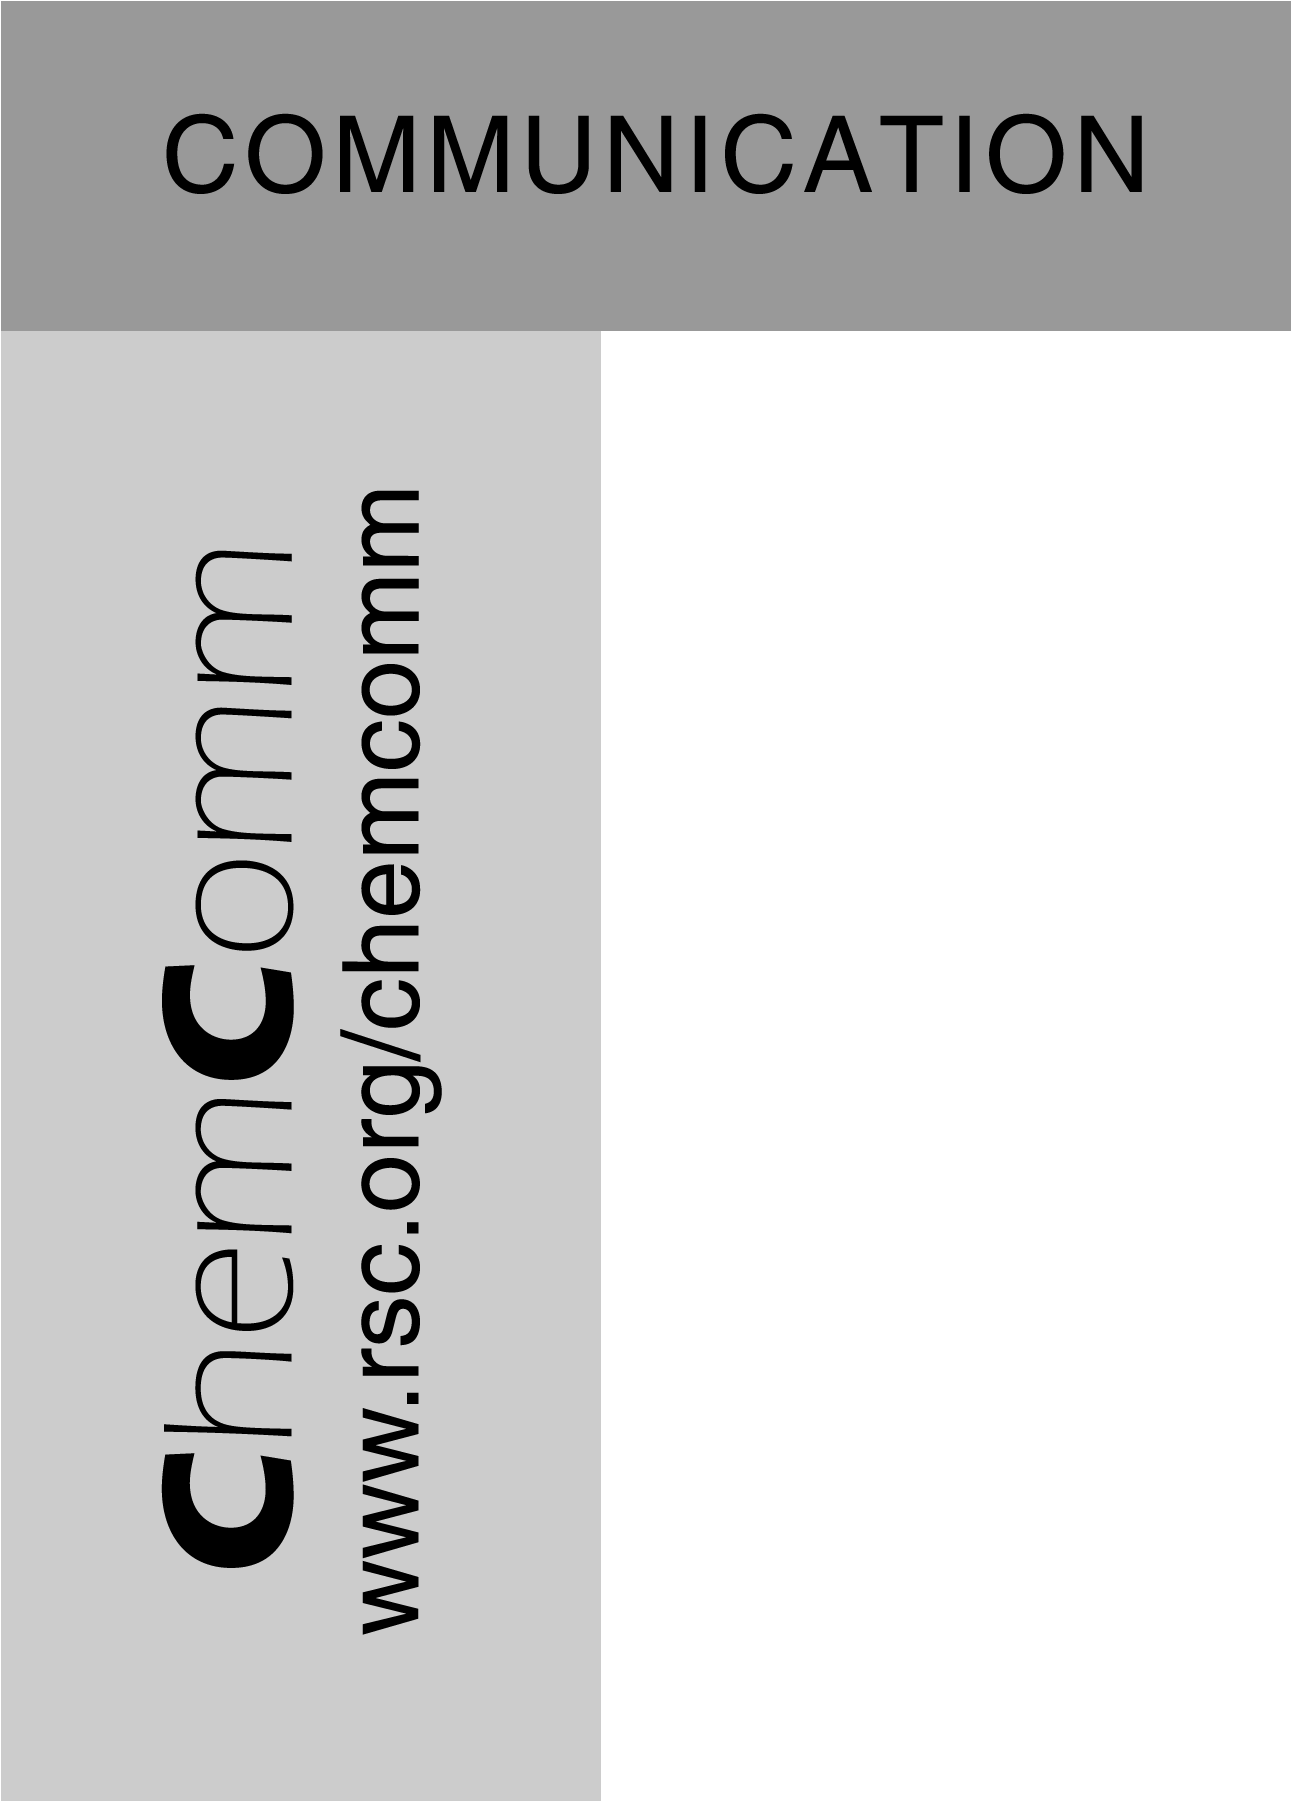

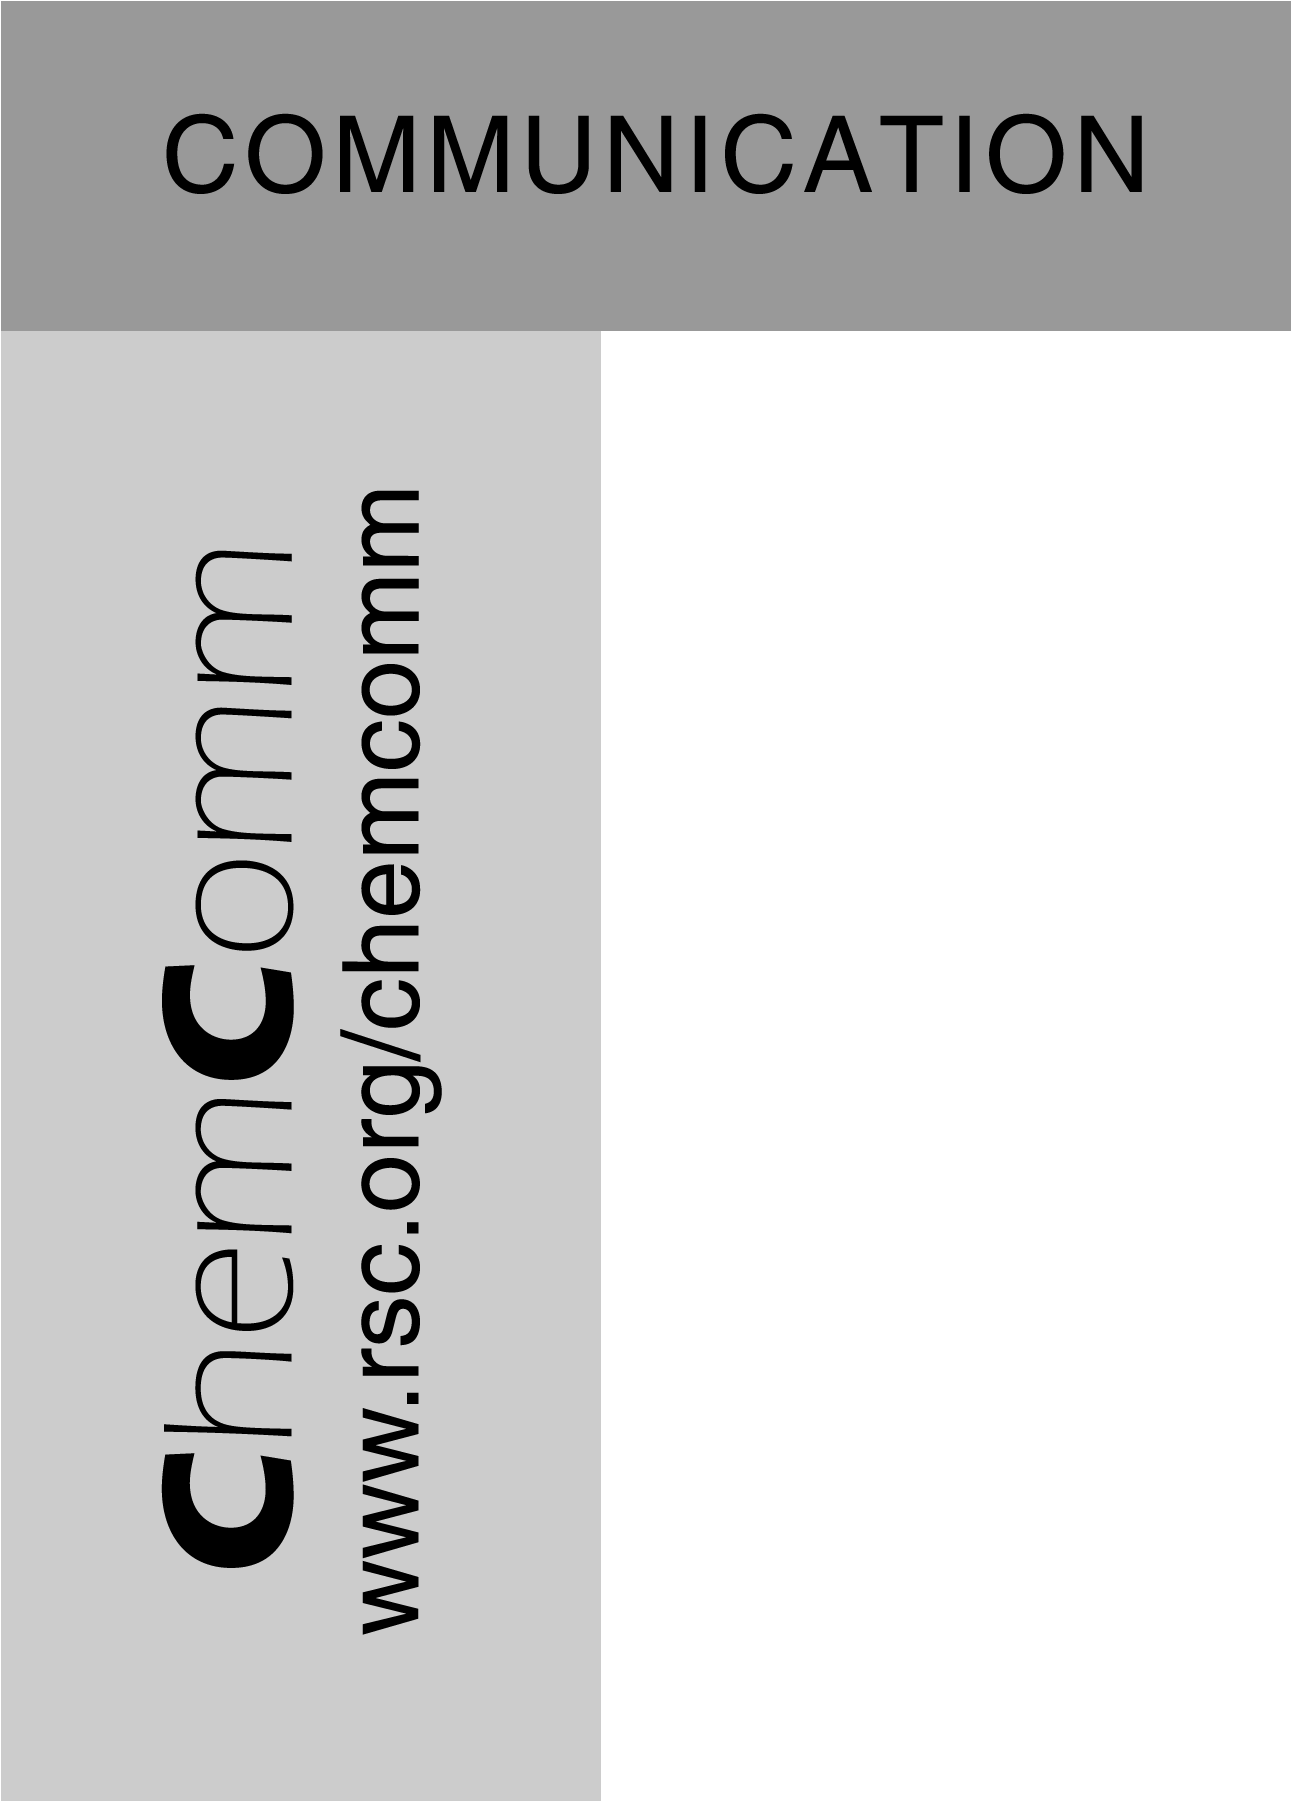
Direct Synthesis and Aqueous Solution Properties of Y-shaped, Stimulus-responsive Block Copolymer Surfactants

Yuanli Cai, Carine Burguiere and Steven P. Armes*

Department of Chemistry, School of Life Sciences, University of Sussex, Falmer, Brighton, East Sussex, BN1 9QJ, UK.

E-mail: [S.P.Armes@sussex.ac.uk](mailto:S.P.Armes@sussex.ac.uk) Fax:+44 1273-677196; Tel: +44 1273-678650

This submission was created using the RSC ChemComm Template (DO NOT DELETE THIS TEXT)

† Electronic Supplementary Information (ESI) available: [details of any supplementary information available should be included here]. See http://www.rsc.org/suppdata/cc/b0/b000000a/

(LINE INCLUDED FOR SPACING ONLY - DO NOT DELETE THIS TEXT)

Electronic Supplementary Information (ESI) Section

**Electronic Supplementary Information (ESI)**

**Synthesis of PEO23-b-DEA10 and PEO23-b-DEA20 Diblock Copolymer**s

PEO23-based macroinitiator (PEO23-Br) was synthesised by esterification of monohydroxyl-capped PEO23 with 2-bromoisobutyryl bromide as reported previously (S. Liu, J. V. M. Weaver, Y. Tang, N. C. Billingham, S. P. Armes, K. Tribe, *Macromolecules*, 2002, **35**, 6131). The diblock copolymers were achieved by the ATRP of DEA using PEO23-Br macro-initiator in 50 % methanol at 20 oC at [DEA]:[PEO23-Br]:[CuBr]:[bpy] relative molar ratios of 10:1:0.3:0.6 for the PEO23-b-DEA10 and 20:1:0.6:1.2 for the PEO23-b-DEA20. Polymerisations were terminated after 98 % conversion as judged by 1H NMR studies. The reaction solution turned blue on exposure to air, indicating aerial oxidation of the Cu(I) catalyst. The resulting copolymer was diluted with methanol and passed through a silica column to remove the spent ATRP catalyst. The polymer solution was dried under vacuum to remove solvent. GPC analyses indicated that near-monodisperse diblock copolymers were obtained and and 1H NMR studies (CDCl3) enabled the degrees of polymerisation of the DEA blocks to be calculated by end group analysis (PEO23-b-DEA10: Mn,cal = 3,100, Mn,NMR = 3,650, Mn,GPC = 6,200, Mw/Mn = 1.21; PEO23-b-DEA20: Mn,cal = 4,900, Mn,NMR = 5,600, Mn,GPC = 8,400, Mw/Mn = 1.23).

**Copolymer Characterization**

Dynamic light scattering studies were carried out on 0.5 w/v % aqueous solutions at 20 oC at a scattering angle of 90o using a Brookhaven BI-9000AT instrument equipped with a 125 mW laser operating at  = 532 nm. The intensity-average hydrodynamic diameter was calculated from the measured diffusion coefficients using the Stokes-Einstein equation. Surface tensiometry measurements were made using a Kruss K10 instrument equipped with a Pt ring at 20 oC. The surface tension of doubly-distilled, de-ionised water (71 mN m-1) was checked periodically between measurements. 0.5 w/v % aqueous solutions were used for all measurements. 1H NMR spectra (16 scans per spectrum) were recorded at 20 oC in D2O using a 300 MHz Bruker Avance spectrometer. The solution pH was adjusted as required using either DCl or NaOD.

# Abbreviations used for Monomers and Polymers

DMA: 2-(dimethylamino)ethyl methacrylate; DEA: 2-(diethylamino)ethyl methacrylate; MEMA: 2-(*N*-Morpholino)ethyl methacrylate; HEMA: 2-hydroxyethyl methacrylate; GMA: glycerol monomethacrylate; HEA: 2-hydroxyethyl acrylate; SEMA: 2-succinyloxyethyl methacrylate; PEO: poly(ethylene oxide); PMMA: poly(methyl methacrylate); PAA: poly(acrylic acid).

**Fig. S2** Surface tension vs. pH curves for 2 g/L aqueous solutions of the non-linear JM1000-b-(DEA10)2 and the two linear PEO23-b-DEA10 and PEO23-b-DEA20 copolymers at 20 oC.

**Fig. S3** 1H NMR spectra for the JM1000-Br2 (upper spectrum), the JM1000-b-(HEMA10)2 Y-shaped copolymer precursor (middle spectrum) and the final acidic Y-shaped copolymer [JM1000-b-(SEMA10)2 (lower spectrum)].

**Fig. S1** THF GPC traces: (1) JM1000-Br2 ATRP macroinitiator and (2) the corresponding Y-shaped JM1000-b-(DMA10)2 block copolymer.

**Fig. S4** Variation of hydrodynamic diameter (Dh) and light scattering intensity as a function of temperature for 5 g/L aqueous solution of the JM2005-b-(GMA20)2 Y-shaped copolymer
